# Supplementary material for: Crystal structures and variable magnetism of PbCu2(XO3)2Cl2 with X = Se, Te
Source: Royal Society of Chemistry journal article supplement (doi:10.1039/c3dt50426c), 2013-01-01
Supplement: c3dt50426c.pdf [file c3dt50426c.pdf]

## Supplementary information for Crystal structures and variable magnetism of $\text{PbCu}_2(\text{XO}_3)_2\text{Cl}_2$ with $\text{X} = \text{Se}, \text{Te}$

Peter S. Berdonosov, Oleg Janson, Andrey V. Olenov,  
 Sergey V. Krivovichev, Helge Rosner, Valery A. Dolgikh, and Alexander A. Tsirlin

TABLE S1. Crystal data and structure refinement for  $\text{PbCu}_2(\text{SeO}_3)_2\text{Cl}_2$  and  $\text{PbCu}_2(\text{TeO}_3)_2\text{Cl}_2$ .

| Empirical formula                               | $\text{PbCu}_2(\text{SeO}_3)_2\text{Cl}_2$       | $\text{PbCu}_2(\text{TeO}_3)_2\text{Cl}_2$   |
|-------------------------------------------------|--------------------------------------------------|----------------------------------------------|
| Crystal system                                  | monoclinic                                       | monoclinic                                   |
| Space group                                     | $C2/c$ (No. 15)                                  | $P12_11$ (No. 4)                             |
| $a$ (Å)                                         | 13.0560(10)                                      | 7.2401(2)                                    |
| $b$ (Å)                                         | 9.5567(9)                                        | 7.2688(2)                                    |
| $c$ (Å)                                         | 6.9006(6)                                        | 8.2846(2)                                    |
| $\beta$ (deg)                                   | 90.529(7)                                        | 96.416(2)                                    |
| Volume (Å <sup>3</sup> )                        | 860.97(13)                                       | 433.26(2)                                    |
| $Z$                                             | 4                                                | 2                                            |
| Calculated density (g/cm <sup>3</sup> )         | 5.085                                            | 5.798                                        |
| Absorption coefficient (mm <sup>-1</sup> )      | 33.465                                           | 31.450                                       |
| Instrument                                      | STOE IPDS                                        | STOE StadiVari                               |
| Crystal size (mm)                               | 0.1 × 0.05 × 0.02                                | 0.2 × 0.12 × 0.08                            |
| $\theta$ range (deg)                            | 2.64 – 29.13                                     | 2.83 – 25.99                                 |
| $h, k, l$ ranges                                | –17 ≤ $h$ ≤ 17<br>–13 ≤ $k$ ≤ 11<br>–9 ≤ $l$ ≤ 9 | –5 ≤ $h$ ≤ 8<br>–8 ≤ $k$ ≤ 7<br>10 ≤ $l$ ≤ 9 |
| No. of reflections                              | 2954                                             | 1840                                         |
| Independent reflections                         | 1157 ( $R_{\text{int}} = 0.067$ )                | 3277 ( $R_{\text{int}} = 0.0809$ )           |
| Refinement method                               | full-matrix least-squares on $F^2$ , Shelx       |                                              |
| Data/restraints/parameters                      | 1157/0/63                                        | 1412/1/119                                   |
| Goodness-of-fit on $F^2$                        | 1.057                                            | 1.031                                        |
| $R(I > 2\sigma(I))$                             | $R_1 = 0.0298, wR_2 = 0.0537$                    | $R_1 = 0.0540, wR_2 = 0.1396$                |
| $R$ (all data)                                  | $R_1 = 0.0371, wR_2 = 0.0553$                    | $R_1 = 0.0570, wR_2 = 0.1408$                |
| Extinction coefficient                          | 0.00274(16)                                      | 0.040(4)                                     |
| Largest diff. peak and hole (e/Å <sup>3</sup> ) | 1.618, –1.289                                    | 4.42, –3.44                                  |

TABLE S2. Atomic positions and isotropic atomic displacement parameters  $U_{\text{iso}}$  (in  $10^{-2}$  Å<sup>2</sup>) in  $\text{PbCu}_2(\text{SeO}_3)_2\text{Cl}_2$ .  $U_{\text{iso}}$  are defined as one third of the trace of the orthogonalized  $U_{ij}$  tensor.

|       | Position | $x/a$       | $y/b$       | $z/c$      | $U_{\text{iso}}$ |
|-------|----------|-------------|-------------|------------|------------------|
| Pb    | 4e       | 0.5         | 0.15837(4)  | 0.25       | 1.3(1)           |
| Se    | 8f       | 0.66777(4)  | 0.39768(7)  | 0.08750(8) | 1.0(1)           |
| Cu(1) | 4e       | 0.5         | 0.38774(13) | 0.75       | 1.4(1)           |
| Cu(2) | 4c       | 0.75        | 0.75        | 0          | 1.5(1)           |
| Cl    | 8f       | 0.62544(12) | 0.8968(2)   | 0.1207(3)  | 2.2(1)           |
| O(1)  | 8f       | 0.5477(3)   | 0.3466(5)   | 0.0081(6)  | 1.5(1)           |
| O(2)  | 8f       | 0.3394(3)   | 0.2877(5)   | 0.2159(7)  | 1.7(1)           |
| O(3)  | 8f       | 0.6431(3)   | 0.5576(5)   | 0.1759(7)  | 1.6(1)           |

TABLE S3. Atomic positions and isotropic atomic displacement parameters  $U_{\text{iso}}$  (in  $10^{-2} \text{ \AA}^2$ ) in  $\text{PbCu}_2(\text{TeO}_3)_2\text{Cl}_2$ .  $U_{\text{iso}}$  are defined as one third of the trace of the orthogonalized  $U_{ij}$  tensor. All atoms are in the general position  $2a$  of the  $P2_1$  space group.

|       | $x/a$       | $y/b$      | $z/c$       | $U_{\text{iso}}$ |
|-------|-------------|------------|-------------|------------------|
| Pb    | 0.12805(14) | 0.1000(2)  | 0.06175(14) | 1.35(5)          |
| Te(1) | 0.8728(2)   | 0.9580(3)  | 0.6128(2)   | 0.65(6)          |
| Te(2) | 0.3551(2)   | 0.7298(3)  | 0.7679(2)   | 0.64(6)          |
| Cu(1) | 0.3622(4)   | 0.5923(7)  | 0.0902(4)   | 0.85(8)          |
| Cu(2) | 0.3180(5)   | 0.1085(7)  | 0.5868(5)   | 1.01(8)          |
| Cl(1) | 0.5533(11)  | 0.3254(12) | 0.6245(10)  | 1.6(2)           |
| Cl(2) | 0.1106(12)  | 0.3397(12) | 0.7709(11)  | 1.7(2)           |
| O(1)  | 0.459(3)    | 0.969(3)   | 0.760(2)    | 0.8(4)           |
| O(2)  | 0.853(3)    | 0.975(4)   | 0.835(3)    | 1.3(5)           |
| O(3)  | 0.128(3)    | 0.918(3)   | 0.624(3)    | 1.1(5)           |
| O(4)  | 0.204(3)    | 0.755(3)   | 0.941(3)    | 0.9(4)           |
| O(5)  | 0.809(3)    | 0.710(4)   | 0.607(3)    | 1.3(5)           |
| O(6)  | 0.540(3)    | 0.650(3)   | 0.936(3)    | 1.0(5)           |

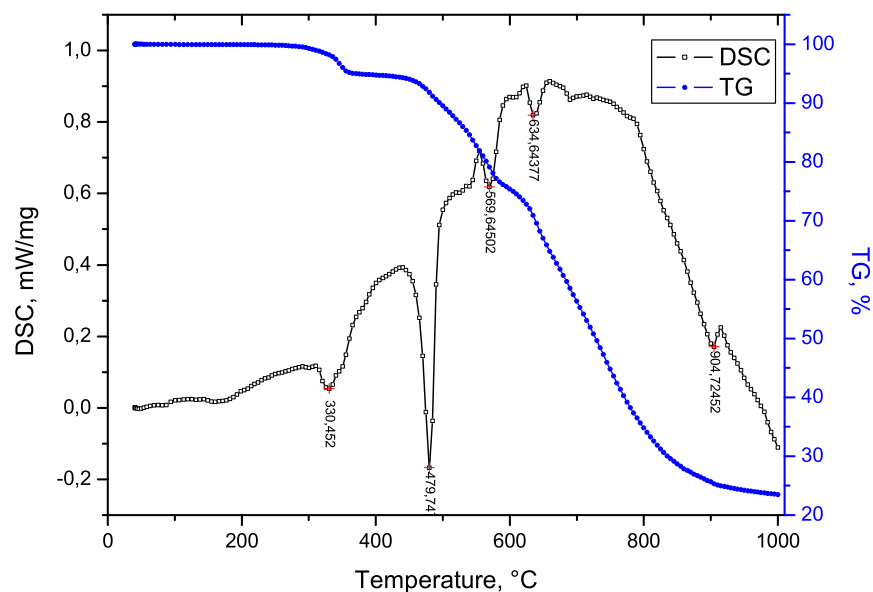

FIG. S1. Thermal decomposition of  $\text{PbCu}_2(\text{SeO}_3)_2\text{Cl}_2$  studied by differential scanning calorimetry (DSC) and thermogravimetry (TG). The multi-step decomposition process starts at  $\sim 300^\circ\text{C}$ . The heating rate is  $10^\circ\text{C}/\text{min}$ .

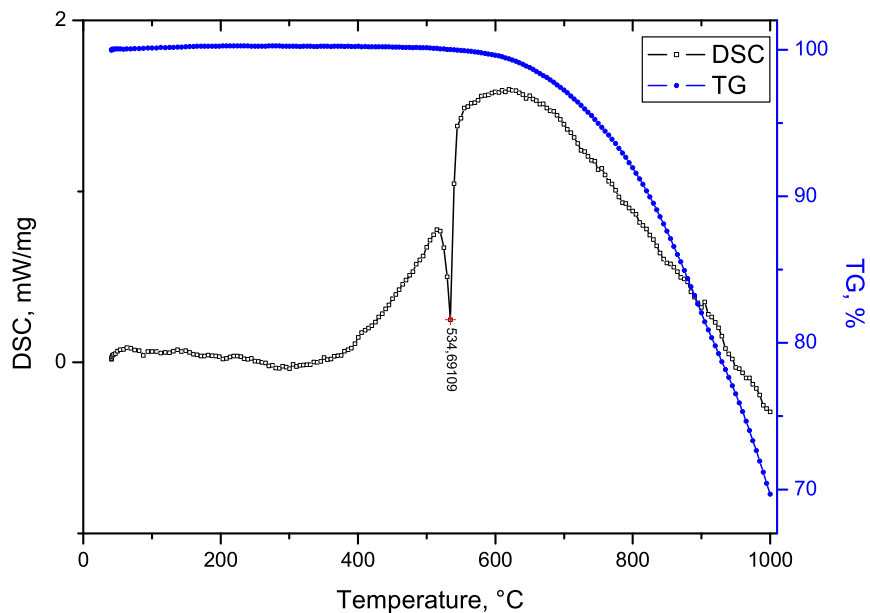

FIG. S2. Thermal decomposition of  $\text{PbCu}_2(\text{TeO}_3)_2\text{Cl}_2$  studied by differential scanning calorimetry (DSC) and thermogravimetry (TG). Thermal decomposition starts at  $\sim 500^\circ\text{C}$ , but it remains incomplete even at  $1000^\circ\text{C}$ . The heating rate is  $10^\circ\text{C}/\text{min}$ .

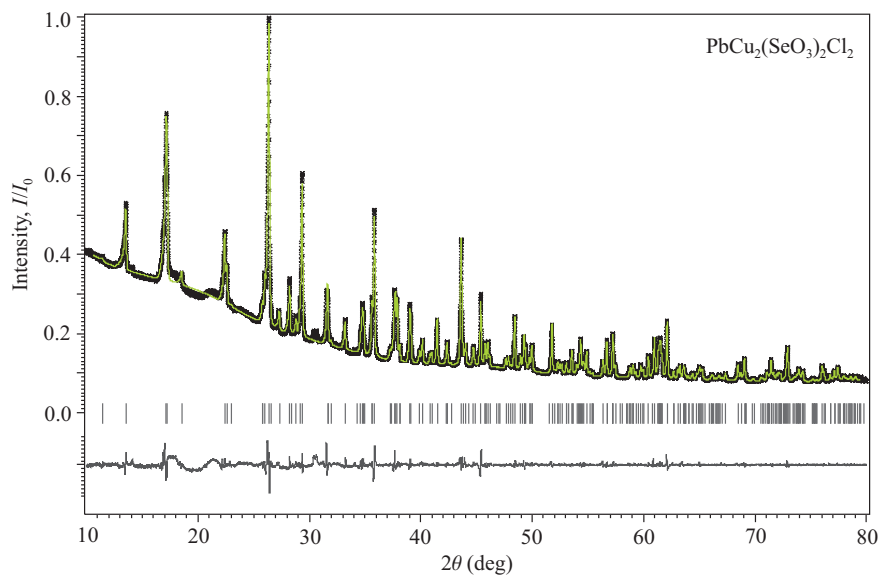

FIG. S3. Powder pattern of  $\text{PbCu}_2(\text{SeO}_3)_2\text{Cl}_2$  (crystals selected from the batch and used for the magnetic susceptibility measurements) and its fit using the structural data obtained from the single crystal. The high background at low angles is due to a very small amount of sample (5 mg). Broad features at  $2\theta = 18^\circ$  and  $22^\circ$  are from vaseline that was used as adhesive. A weak reflection at  $2\theta = 31.5^\circ$  belongs to the residual foreign phase (ferromagnetic impurity).

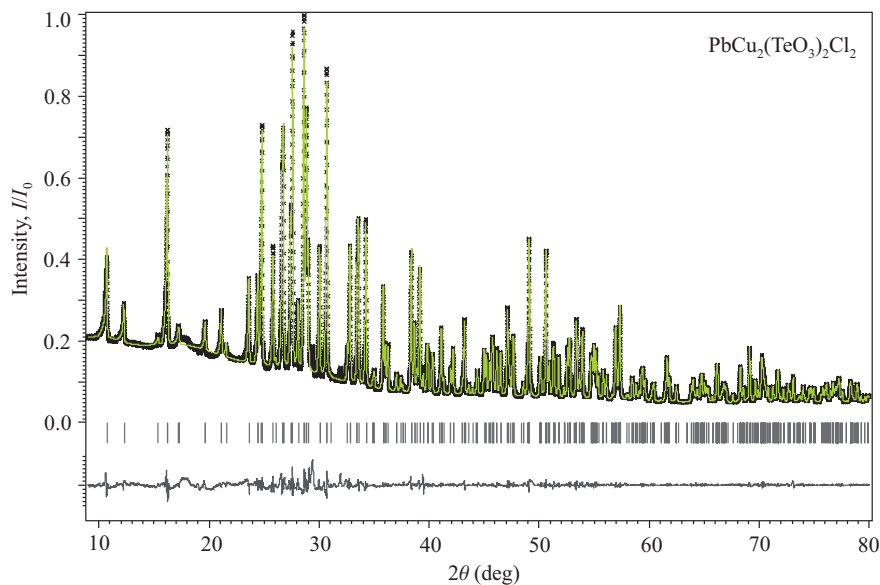

FIG. S4. Powder pattern of  $\text{PbCu}_2(\text{SeO}_3)_2\text{Cl}_2$  and its fit using the structural data obtained from the single crystal. The broad feature at  $2\theta = 18^\circ$  is from vaseline that was used as adhesive. Reflections of impurities ( $\text{CuTe}_2\text{O}_5$ ,  $3\text{PbTeO}_3 \times 2\text{H}_2\text{O}$ ) are barely visible on this scale.

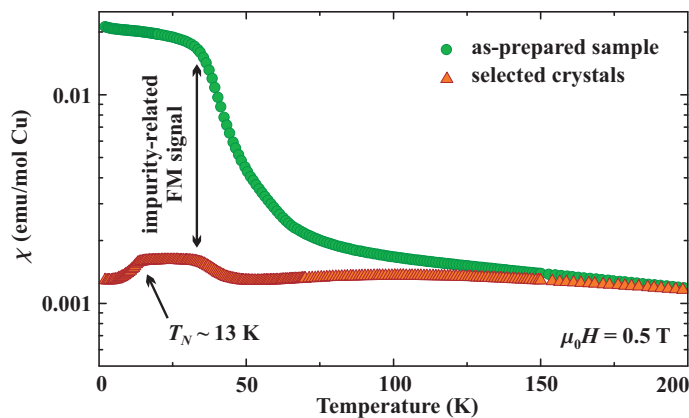

FIG. S5. Magnetic susceptibility of the as-prepared sample of  $\text{PbCu}_2(\text{SeO}_3)_2\text{Cl}_2$  (circles) and selected batch of crystals (triangles).

TABLE S4. The leading magnetic exchange couplings in  $\text{PbCu}_2(\text{SeO}_3)_2\text{Cl}_2$  and  $\text{PbCu}_2(\text{TeO}_3)_2\text{Cl}_2$ : Cu–Cu distances ( $d_{\text{Cu-Cu}}$ , in Å), transfer integrals  $t_{ij}$  (in meV), antiferromagnetic ( $J_{ij}^{\text{AFM}}$ ) and ferromagnetic ( $J_{ij}^{\text{FM}}$ ) contributions to the total magnetic exchange ( $J_{ij}$ , in K). The  $t_{ij}$  terms are evaluated from the GGA bands using Wannier functions.  $J_{ij}^{\text{AFM}}$  are approximated using  $J_{ij}^{\text{AFM}} = 4t_{ij}^2/U_{\text{eff}}$  adopting  $U_{\text{eff}} = 4.5 \text{ eV}$ . The ferromagnetic contribution  $J^{\text{FM}}$  is evaluated as the difference between  $J_{ij}^{\text{AFM}}$  and  $J_{ij}$ , where the latter term is estimated from the GGA+ $U$  calculations.

| $\text{PbCu}_2(\text{SeO}_3)_2\text{Cl}_2$ |                    |          |                  |                 |          |
|--------------------------------------------|--------------------|----------|------------------|-----------------|----------|
|                                            | $d_{\text{Cu-Cu}}$ | $t_{ij}$ | $J^{\text{AFM}}$ | $J^{\text{FM}}$ | $J_{ij}$ |
| $J_1$                                      | 6.23               | -143     | 211              | -45             | 166      |
| $J_{\text{ic1}}$                           | 8.65               | -47      | 23               | -6              | 17       |
| $J_{\text{ic2}}$                           | 8.09               | -70      | 51               | -11             | 39       |
| $\text{PbCu}_2(\text{TeO}_3)_2\text{Cl}_2$ |                    |          |                  |                 |          |
|                                            | $d_{\text{Cu-Cu}}$ | $t_{ij}$ | $J^{\text{AFM}}$ | $J^{\text{FM}}$ | $J_{ij}$ |
| $J$                                        | 3.34               | 143      | 211              | -15             | 196      |
| $J'$                                       | 5.59               | -90      | 84               | -               | 86       |

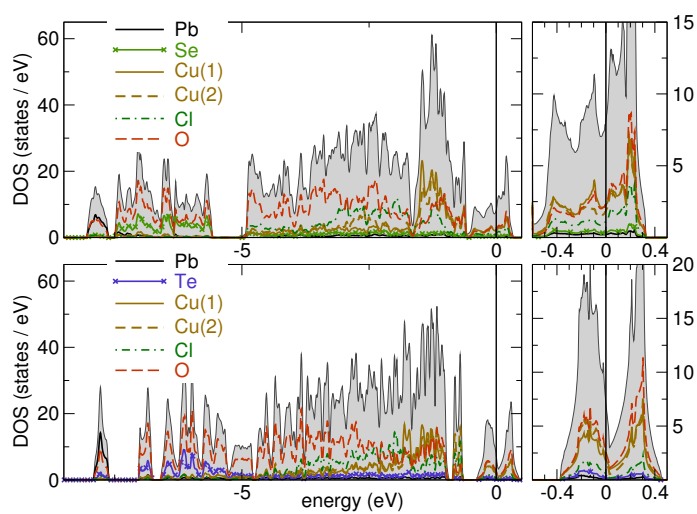

FIG. S6. GGA total (shaded) and partial (lines) DOS for  $\text{PbCu}_2(\text{SeO}_3)_2\text{Cl}_2$  (top) and  $\text{PbCu}_2(\text{TeO}_3)_2\text{Cl}_2$  (bottom). The magnetically active states around the Fermi level are zoomed in the right panels. Number of states is given per primitive cell. Fermi level is at zero energy.

## DETAILS OF DFT CALCULATIONS

The  $3d^9$  electronic configuration of  $\text{Cu}^{2+}$  should lead to a partial filling of the  $3d$  bands and, therefore, to the metallic behavior. However, strong electronic correlations that are inherent to the strongly localized  $\text{Cu } 3d$  states trigger the formation of a band gap and the overall insulating behavior.

Electronic correlations are many-body effects that can not be accounted for on the standard DFT level. This explains the metallic ground state indicated by nonzero density of states at the Fermi level, in both LDA and GGA calculations (both functionals yield nearly indistinguishable density of states [DOS] and band dispersions), see Fig. S6. The correct insulating state can be reproduced by supplying the standard DFT functionals with the strong Coulomb correlations in the  $\text{Cu } 3d$  shell. This is done in two complementary approaches: i) on the model level, or ii) by a static mean-field treatment within the DFT+ $U$  formalism.

In standard GGA, both  $\text{PbCu}_2(\text{SeO}_3)_2\text{Cl}_2$  and  $\text{PbCu}_2(\text{TeO}_3)_2\text{Cl}_2$  feature a well-structured valence band (Fig. S6): the bottom edge shows a peak of  $\text{Pb-O}$  states (around  $-8$  eV), the energy range between  $-7.5$  eV and  $-5.5$  eV is dominated by  $\text{Se/Te}$  and  $\text{O}$  states, while the rest of the valence band is formed predominantly by  $\text{Cu}$ ,  $\text{O}$ , and  $\text{Cl}$  states. The magnetically active states are located in a close vicinity of the Fermi level. In  $\text{PbCu}_2(\text{TeO}_3)_2\text{Cl}_2$ , these states are well-separated from the rest of the valence band. In  $\text{PbCu}_2(\text{SeO}_3)_2\text{Cl}_2$ , these states are separated from the rest of the valence band by a dip in the DOS spectrum.

In cuprates, the magnetically relevant states are conveniently described in terms of atomic-like orbitals. In the most common case of a  $\text{CuO}_4$  plaquette, it is a single molecular-like orbital comprising the  $\text{Cu } 3d$  orbital stretched towards the four  $\text{O}$  atoms, and the four  $\sigma$ -bonded  $\text{O } 2p$  orbitals. These states can be denoted according to the local coordinate system, with the  $x$  and  $y$  axes running along the  $\text{Cu-O}$  bond, and the  $z$  axis perpendicular to the plaquette plane. In this setup, the magnetically active orbital of  $\text{Cu}$  has the  $x^2 - y^2$  character. This is the case for  $\text{Cu}(1)$  in both  $\text{PbCu}_2(\text{SeO}_3)_2\text{Cl}_2$  and  $\text{PbCu}_2(\text{TeO}_3)_2\text{Cl}_2$ .

In the case of  $\text{Cu}(2)$ , the same arguments apply. We find the magnetic  $d_{x^2-y^2}$  orbital, with the  $x$  and  $y$  axes running along the four shortest  $\text{Cu-O/Cl}$  bonds that are nearly coplanar. The two long  $\text{Cu-O}$  ( $X = \text{Se}$ ) or  $\text{Cu-Cl}$  ( $X = \text{Te}$ ) bonds are directed along the local  $z$  axis. The respective atoms do not contribute to the magnetic orbital and do not facilitate the magnetic interaction. This way, we identify the  $\text{Cu}(2)\text{O}_3\text{Cl}$  and  $\text{Cu}(2)\text{O}_2\text{Cl}_2$  plaquettes in  $\text{PbCu}_2(\text{SeO}_3)_2\text{Cl}_2$  and  $\text{PbCu}_2(\text{TeO}_3)_2\text{Cl}_2$ , respectively.

The  $dp_\sigma$  molecular-like orbitals form a convenient basis set for an effective one-orbital model that describes electron transfer between different  $\text{Cu}^{2+}$  sites. The energy terms  $t_{ij}$  responsible for the electron transfer should be supplemented by a Coulomb interaction term that penalizes the doubly occupied states. For sufficiently strong correlations, the AFM exchange  $J_{ij}^{\text{AFM}}$  is proportional to  $t_{ij}^2$ , where  $t_{ij}$  is related to the probability of the electron hopping between sites  $i$  and  $j$ . The  $t_{ij}$  terms can be evaluated directly from LDA or GGA band structure calculations using localized Wannier functions (numerical values for the relevant terms are given in Table S4).
